# Supplementary material
Source: Elsevier journal article supplement (https://www.sciencedirect.com/science/article/pii/S0210569121001704)
Supplement: mmc2 [file S0210569121001704:mmc2.pdf]

## **Supplemental Electronic Material 2**

**Supplemental electronic material 2.** Spanish version of the Measure of Moral Distress – Healthcare Professionals Spanish questionnaire (MMD-HP-SPA). Questionnaire to measure moral distress levels among healthcare professionals working in Spanish ICUs

|                                                                                                                                                                                                 | Frecuencia |   |               |   |   | Nivel de Desasosiego |   |       |   |   |
|-------------------------------------------------------------------------------------------------------------------------------------------------------------------------------------------------|------------|---|---------------|---|---|----------------------|---|-------|---|---|
|                                                                                                                                                                                                 | Nunca      |   | Muy frecuente |   |   | Ninguno              |   | Mucho |   |   |
|                                                                                                                                                                                                 | 0          | 1 | 2             | 3 | 4 | 0                    | 1 | 2     | 3 | 4 |
| 1. Estar presente cuando el paciente o su familia reciben "falsas esperanzas" por parte de profesionales sanitarios.                                                                            |            |   |               |   |   |                      |   |       |   |   |
| 2. Ceder ante la insistencia de la familia y continuar un tratamiento agresivo, incluso creyendo que esto no es lo mejor para el paciente.                                                      |            |   |               |   |   |                      |   |       |   |   |
| 3. Sentirse presionado/a para pautar o llevar a cabo órdenes, que yo considero pruebas o tratamientos innecesarios o inapropiados.                                                              |            |   |               |   |   |                      |   |       |   |   |
| 4. No poder proporcionar una atención óptima debido a las presiones de los administradores para reducir los gastos.                                                                             |            |   |               |   |   |                      |   |       |   |   |
| 5. Continuar proporcionando un tratamiento agresivo a una persona que tiene muchas probabilidades de morir, independientemente de este tratamiento, cuando nadie toma la decisión de retirarlo. |            |   |               |   |   |                      |   |       |   |   |
| 6. Ser presionado/a para no tomar medidas cuando sé que un/a médico, enfermera/o u otro miembro del equipo ha cometido un error y no lo comunica.                                               |            |   |               |   |   |                      |   |       |   |   |
| 7. Ser requerido/a para atender a pacientes que no me siento calificado/a para atender.                                                                                                         |            |   |               |   |   |                      |   |       |   |   |
| 8. Participar en cuidados que causen sufrimiento innecesario o que no alivien adecuadamente el dolor u otros síntomas.                                                                          |            |   |               |   |   |                      |   |       |   |   |
| 9. Observar un deterioro en la calidad de la atención del paciente debido a la falta de continuidad del personal sanitario.                                                                     |            |   |               |   |   |                      |   |       |   |   |
| 10. Cumplir la petición de un médico o un miembro de la familia para no comentar el pronóstico del paciente con él mismo o su familia.                                                          |            |   |               |   |   |                      |   |       |   |   |
| 11. Ser testigo del incumplimiento de un estándar de práctica clínica o una norma deontológica y no sentirse lo suficientemente respaldado para informar sobre dicho incumplimiento.            |            |   |               |   |   |                      |   |       |   |   |
| 12. Participar, por temor a demandas/juicios, en tratamientos con los que no estoy de acuerdo.                                                                                                  |            |   |               |   |   |                      |   |       |   |   |

|                                                                                                                                                                 | Frecuencia |   |   |               |   | Nivel de Desasosiego |   |   |       |   |
|-----------------------------------------------------------------------------------------------------------------------------------------------------------------|------------|---|---|---------------|---|----------------------|---|---|-------|---|
|                                                                                                                                                                 | Nunca      |   |   | Muy frecuente |   | Ninguno              |   |   | Mucho |   |
|                                                                                                                                                                 | 0          | 1 | 2 | 3             | 4 | 0                    | 1 | 2 | 3     | 4 |
| 13. Tener que trabajar con otros miembros del equipo sanitario que no tienen la competencia que la atención al paciente requiere.                               |            |   |   |               |   |                      |   |   |       |   |
| 14. Observar una baja calidad en la atención proporcionada al paciente debido a la mala comunicación del equipo.                                                |            |   |   |               |   |                      |   |   |       |   |
| 15. Sentirse presionado/a para ignorar situaciones en las que los pacientes no han recibido una información adecuada que garantice el consentimiento informado. |            |   |   |               |   |                      |   |   |       |   |
| 16. Tener que atender a más pacientes de los que puedo atender de forma segura.                                                                                 |            |   |   |               |   |                      |   |   |       |   |
| 17. Ver comprometida la atención del paciente debido a la falta de recursos, equipamiento o disponibilidad de camas.                                            |            |   |   |               |   |                      |   |   |       |   |
| 18. Experimentar la inacción o la falta de apoyo administrativo en un problema que compromete la atención al paciente.                                          |            |   |   |               |   |                      |   |   |       |   |
| 19. Tener que cumplir requisitos de documentación / administrativos excesivos que comprometen la atención al paciente.                                          |            |   |   |               |   |                      |   |   |       |   |
| 20. Tener miedo a represalias si digo lo que se pienso.                                                                                                         |            |   |   |               |   |                      |   |   |       |   |
| 21. Sentirme inseguro/a o intimidado/a entre mis propios compañeros/as.                                                                                         |            |   |   |               |   |                      |   |   |       |   |
| 22. Tener que trabajar con pacientes o familiares agresivos o maleducados que comprometen la calidad de la atención.                                            |            |   |   |               |   |                      |   |   |       |   |
| 23. Sentirse obligado/a a darle demasiada importancia a competencias y a la productividad o a medidas de calidad a expensas de la atención al paciente.         |            |   |   |               |   |                      |   |   |       |   |
| 24. Tener que atender a pacientes con planes de tratamiento poco claros o incongruentes, o que carecen de objetivos terapéuticos.                               |            |   |   |               |   |                      |   |   |       |   |
| 25. Trabajar en equipos, unidades e instituciones con jerarquías de poder que comprometen la atención del paciente.                                             |            |   |   |               |   |                      |   |   |       |   |
| 26. Participar en un equipo que da mensajes contradictorios a un paciente o su familia.                                                                         |            |   |   |               |   |                      |   |   |       |   |
| 27. Trabajar con miembros del equipo que no tratan con dignidad y respeto a los pacientes vulnerables o estigmatizados.                                         |            |   |   |               |   |                      |   |   |       |   |
| Si existen otras situaciones en las que hayas sentido desasosiego moral, escríbelas y califícalas aquí:                                                         |            |   |   |               |   |                      |   |   |       |   |
|                                                                                                                                                                 |            |   |   |               |   |                      |   |   |       |   |
|                                                                                                                                                                 |            |   |   |               |   |                      |   |   |       |   |

¿Alguna vez has abandonado o has considerado abandonar un puesto de trabajo debido al desasosiego moral?

- No, nunca he considerado abandonar o abandoné un puesto de trabajo.
- Sí, consideré abandonar pero no lo hice.
- Sí, abandoné un puesto de trabajo.

¿Estás considerando abandonar tu puesto de trabajo actual debido al desasosiego moral?

- Sí
- No
