# Supplementary material
Source: Elsevier journal article supplement (https://www.sciencedirect.com/science/article/pii/S0210569121001704)
Supplement: mmc3 [file S0210569121001704:mmc3.pdf]

## **Supplemental Electronic Material 3**

**Supplemental electronic material 3.** Spanish version of the Hospital Ethical Climate Survey - Short Form (HECS). Final Spanish version of the HECS questionnaire to measure ICU ethical climate according to physicians and nurses working in Spanish ICUs.

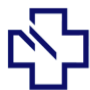

SERVIZO  
GALEGO  
de SAÚDE

Área Sanitaria de Santiago de Compostela  
e Barbanza

Servicio de Medicina Intensiva

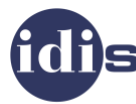

INSTITUTO DE INVESTIGACIÓN SANITARIA  
SANTIAGO DE COMPOSTELA

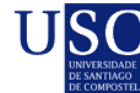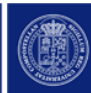

## Cuestionario abreviado de Olson sobre el Clima Ético Hospitalario (HECS)

### Cuestionario para Enfermería

Las siguientes cuestiones tienen que ver con tu situación laboral actual (si no estás trabajando ahora en una Unidad en particular, responde teniendo en cuenta el Área clínica donde trabajas con más frecuencia). A medida que leas y respondas a cada cuestión, piensa en algunas de las situaciones difíciles, con respecto a la atención al paciente, a los que te hayas enfrentado. Es importante que respondas en función de cómo es realmente la situación en tu Unidad, y no cómo preferirías que fuera. Es esencial que respondas a todas las cuestiones. No hay respuestas correctas o incorrectas, así que, por favor, responde honestamente. Marca la columna que mejor refleje tu opinión en relación con las siguientes afirmaciones:

|                                                                                                                                                                 | Frecuencia           |   |                        |   |   |
|-----------------------------------------------------------------------------------------------------------------------------------------------------------------|----------------------|---|------------------------|---|---|
|                                                                                                                                                                 | Casi NUNCA<br>cierto |   | Casi SIEMPRE<br>cierto |   |   |
|                                                                                                                                                                 | 1                    | 2 | 3                      | 4 | 5 |
| 1. Mis compañeros escuchan mis preocupaciones sobre la atención al paciente.                                                                                    |                      |   |                        |   |   |
| 2. Cuando soy incapaz de decidir qué está bien o mal en una situación sobre la atención al paciente, mi supervisor/a me ayuda.                                  |                      |   |                        |   |   |
| 3. Las normas del hospital me resultan útiles cuando tengo problemas difíciles relacionados con la atención al paciente.                                        |                      |   |                        |   |   |
| 4. Las/os enfermeras/os y los/as médicos confiamos los unos en los otros.                                                                                       |                      |   |                        |   |   |
| 5. Una visión clara sobre el objetivo/misión del hospital es compartida con las/os enfermeras/os.                                                               |                      |   |                        |   |   |
| 6. Los sentimientos y valores de todas las partes involucradas en la atención al paciente se tienen en cuenta a la hora de la toma de decisiones.               |                      |   |                        |   |   |
| 7. Mi supervisor/a es alguien en quien puedo confiar.                                                                                                           |                      |   |                        |   |   |
| 8. Cuando surge un conflicto se trata abiertamente, no se evita.                                                                                                |                      |   |                        |   |   |
| 9. Las/os enfermeras/os y los/as médicos aquí respetan las opiniones de los demás, incluso cuando no están de acuerdo sobre lo que es mejor para los pacientes. |                      |   |                        |   |   |
| 10. Trabajo con compañeras/os competentes.                                                                                                                      |                      |   |                        |   |   |
| 11. Se respetan los deseos del paciente.                                                                                                                        |                      |   |                        |   |   |

|                                                                                                                                                                                          | Frecuencia           |   |                        |   |   |
|------------------------------------------------------------------------------------------------------------------------------------------------------------------------------------------|----------------------|---|------------------------|---|---|
|                                                                                                                                                                                          | Casi NUNCA<br>cierto |   | Casi SIEMPRE<br>cierto |   |   |
|                                                                                                                                                                                          | 1                    | 2 | 3                      | 4 | 5 |
| 12. Cuando mis compañeros no son capaces de decidir qué está bien o mal en una situación particular con respecto a la atención del paciente, he observado que mi supervisor/a les ayuda. |                      |   |                        |   |   |
| 13. El ambiente es propicio para cuestionar, aprender y buscar respuestas creativas para los problemas que afectan a la atención del paciente.                                           |                      |   |                        |   |   |
| 14. En mi Unidad, puedo ejercer la enfermería como creo que ésta debería ejercerse.                                                                                                      |                      |   |                        |   |   |



SERVIZO  
GALEGO  
de SAÚDE

Área Sanitaria de Santiago de Compostela  
e Barbanza

Servicio de Medicina Intensiva



INSTITUTO DE INVESTIGACIÓN SANITARIA  
SANTIAGO DE COMPOSTELA



## Cuestionario abreviado de Olson sobre el Clima Ético Hospitalario (HECS)

### Cuestionario para Médicos

Las siguientes cuestiones tienen que ver con tu situación laboral actual (si no estás trabajando ahora en una Unidad en particular, responde teniendo en cuenta el Área clínica donde trabajas con más frecuencia). A medida que leas y respondas a cada cuestión, piensa en algunas de las situaciones difíciles, con respecto a la atención al paciente, a los que te hayas enfrentado. Es importante que respondas en función de cómo es realmente la situación en tu Unidad, y no cómo preferirías que fuera. Es esencial que respondas a todas las cuestiones. No hay respuestas correctas o incorrectas, así que, por favor, responde honestamente. Marca la columna que mejor refleje tu opinión en relación con las siguientes afirmaciones:

|                                                                                                                                                                 | Frecuencia           |   |                        |   |   |
|-----------------------------------------------------------------------------------------------------------------------------------------------------------------|----------------------|---|------------------------|---|---|
|                                                                                                                                                                 | Casi NUNCA<br>cierto |   | Casi SIEMPRE<br>cierto |   |   |
|                                                                                                                                                                 | 1                    | 2 | 3                      | 4 | 5 |
| 1. Mis compañeros escuchan mis preocupaciones sobre la atención al paciente.                                                                                    |                      |   |                        |   |   |
| 2. Cuando soy incapaz de decidir qué está bien o mal en una situación sobre la atención al paciente, mi jefe/a me ayuda.                                        |                      |   |                        |   |   |
| 3. Las normas del hospital me resultan útiles cuando surgen problemas difíciles relacionados con la atención al paciente.                                       |                      |   |                        |   |   |
| 4. Los/as médicos y las/os enfermeras/os confiamos los unos en los otros.                                                                                       |                      |   |                        |   |   |
| 5. Una visión clara sobre el objetivo/misión del hospital es compartida con los/as médicos.                                                                     |                      |   |                        |   |   |
| 6. Los sentimientos y valores de todas las partes involucradas en la atención al paciente se tienen en cuenta a la hora de la toma de decisiones.               |                      |   |                        |   |   |
| 7. Mi jefe/a es alguien en quien puedo confiar.                                                                                                                 |                      |   |                        |   |   |
| 8. Cuando surge un conflicto se trata abiertamente, no se evita.                                                                                                |                      |   |                        |   |   |
| 9. Los/as médicos y las/os enfermeras/os aquí respetan las opiniones de los demás, incluso cuando no están de acuerdo sobre lo que es mejor para los pacientes. |                      |   |                        |   |   |
| 10. Trabajo con compañeros competentes.                                                                                                                         |                      |   |                        |   |   |
| 11. Se respetan los deseos del paciente.                                                                                                                        |                      |   |                        |   |   |

|                                                                                                                                                                                    | Frecuencia           |   |                        |   |   |
|------------------------------------------------------------------------------------------------------------------------------------------------------------------------------------|----------------------|---|------------------------|---|---|
|                                                                                                                                                                                    | Casi NUNCA<br>cierto |   | Casi SIEMPRE<br>cierto |   |   |
|                                                                                                                                                                                    | 1                    | 2 | 3                      | 4 | 5 |
| 12. Cuando mis compañeros no son capaces de decidir qué está bien o mal en una situación particular con respecto a la atención del paciente, he observado que mi jefe/a les ayuda. |                      |   |                        |   |   |
| 13. El ambiente es propicio para cuestionar, aprender y buscar respuestas creativas para los problemas que afectan a la atención del paciente.                                     |                      |   |                        |   |   |
| 14. En mi Unidad, puedo ejercer la medicina como creo que ésta debería ejercerse.                                                                                                  |                      |   |                        |   |   |
